# Supplementary material for: A widespread internal resonance phenomenon in functionally graded material plates with longitudinal speed
Source: PubMed Central journal article supplement (PMC6374398; doi:10.1038/s41598-018-37921-9), 2019-02-13
Supplement: 41598_2018_37921_MOESM1_ESM.pdf [file 41598_2018_37921_MOESM1_ESM.pdf]

# A widespread internal resonance phenomenon in functionally graded material plates with longitudinal speed

Y. F. Zhang \*, J. T. Liu

(School of Aerospace Engineering, Shenyang Aerospace University, Shenyang  
110136, China)

## Appendix

The coefficients in Eq. (31) are as follows for ( $\bar{m}=1, \bar{n}=1$ ) and ( $\bar{j}=2, \bar{k}=1$ )

$$\begin{aligned}
 \bar{M}_1 &= \frac{c}{\int_{-\frac{h}{2}}^{\frac{h}{2}} \rho(z) dz} \\
 \bar{M}_2 &= -\frac{16V}{3a} \\
 \bar{M}_3 &= \frac{\pi^4 D_{11}}{a^4 \int_{-\frac{h}{2}}^{\frac{h}{2}} \rho(z) dz} + \frac{2\pi^4 D_{12}}{a^2 b^2 \int_{-\frac{h}{2}}^{\frac{h}{2}} \rho(z) dz} + \frac{4\pi^4 D_{66}}{a^2 b^2 \int_{-\frac{h}{2}}^{\frac{h}{2}} \rho(z) dz} + \\
 &\quad \frac{\pi^2 N_0}{a^2 \int_{-\frac{h}{2}}^{\frac{h}{2}} \rho(z) dz} - \frac{\pi^2 V^2}{a^2} + \frac{\pi^4 D_{22}}{b^4 \int_{-\frac{h}{2}}^{\frac{h}{2}} \rho(z) dz} \\
 \bar{M}_4 &= -\frac{8cV}{3a \int_{-\frac{h}{2}}^{\frac{h}{2}} \rho(z) dz} \\
 \bar{M}_5 &= \left( \frac{3\pi^4 A_{11}}{32a^4} + \frac{3\pi^4 A_{12}}{16a^2 b^2} - \frac{\pi^4 A_{66}}{8a^2 b^2} + \frac{3\pi^4 A_{22}}{32b^4} \right) \bigg/ \int_{-\frac{h}{2}}^{\frac{h}{2}} \rho(z) dz \\
 \bar{M}_6 &= \left( \frac{3\pi^4 A_{11}}{4a^4} + \frac{21\pi^4 A_{12}}{16a^2 b^2} - \frac{\pi^4 A_{66}}{a^2 b^2} + \frac{3\pi^4 A_{22}}{16b^4} \right) \bigg/ \int_{-\frac{h}{2}}^{\frac{h}{2}} \rho(z) dz \\
 \bar{M}_7 &= \left( \frac{32\pi^2 B_{11}}{9a^4} + \frac{160\pi^2 B_{12}}{9a^2 b^2} + \frac{32\pi^2 B_{66}}{9a^2 b^2} + \frac{32\pi^2 B_{22}}{9b^4} \right) \bigg/ \int_{-\frac{h}{2}}^{\frac{h}{2}} \rho(z) dz \\
 \bar{M}_8 &= \left( \frac{3584\pi^2 B_{11}}{45a^4} + \frac{512\pi^2 B_{12}}{9a^2 b^2} + \frac{1664\pi^2 B_{66}}{45a^2 b^2} + \frac{128\pi^2 B_{22}}{45b^4} \right) \bigg/ \int_{-\frac{h}{2}}^{\frac{h}{2}} \rho(z) dz \\
 \bar{M}_9 &= \frac{4F_0}{ab \int_{-\frac{h}{2}}^{\frac{h}{2}} \rho(z) dz} \sin\left(\frac{\pi x_0}{a}\right) \sin\left(\frac{\pi y_0}{b}\right) \tag{A1}
 \end{aligned}$$

$$\begin{aligned}
\bar{S}_1 &= \frac{16V}{3a} \\
\bar{S}_2 &= \frac{c}{\int_{-\frac{h}{2}}^{\frac{h}{2}} \rho(z) dz} \\
\bar{S}_3 &= \frac{8cV}{3a \int_{-\frac{h}{2}}^{\frac{h}{2}} \rho(z) dz} \\
\bar{S}_4 &= \frac{1}{a^4 b^4 \int_{-\frac{h}{2}}^{\frac{h}{2}} \rho(z) dz} (\pi^4 a^4 D_{22} - 4\pi^2 a^2 b^4 V^2 \int_{-\frac{h}{2}}^{\frac{h}{2}} \rho(z) dz + 4\pi^2 a^2 b^4 N_0 + \\
&\quad 8\pi^4 a^2 b^2 D_{12} + 16\pi^4 a^2 b^2 D_{66} + 16\pi^4 b^4 D_{11}) \\
\bar{S}_5 &= \frac{\pi^4 (3a^4 A_{22} + 24a^2 A_{12} b^2 - 16a^2 A_{66} b^2 + 48A_{11} b^4)}{32a^4 b^4 \int_{-\frac{h}{2}}^{\frac{h}{2}} \rho(z) dz} \\
\bar{S}_6 &= \frac{\pi^4 (3a^4 A_{22} + 9a^2 A_{12} b^2 - 4a^2 A_{66} b^2 + 12A_{11} b^4)}{16a^4 b^4 \int_{-\frac{h}{2}}^{\frac{h}{2}} \rho(z) dz} \\
\bar{S}_7 &= \frac{128\pi^2 (2a^4 B_{22} + 25a^2 b^2 B_{12} - 4a^2 b^2 B_{66} + 5b^4 B_{11})}{45a^4 b^4 \int_{-\frac{h}{2}}^{\frac{h}{2}} \rho(z) dz}
\end{aligned} \tag{A2}$$
